# Supplementary material for: Acetaminophen Metabolites on Presentation Following an Acute Acetaminophen Overdose (ATOM‐7)
Source: PubMed Central journal article supplement (PMC10952325; doi:10.1002/cpt.2888), 2023-04-06
Supplement: CPT-113-1304-s001.pdf [file CPT-113-1304-s001.pdf]

Supplementary Files

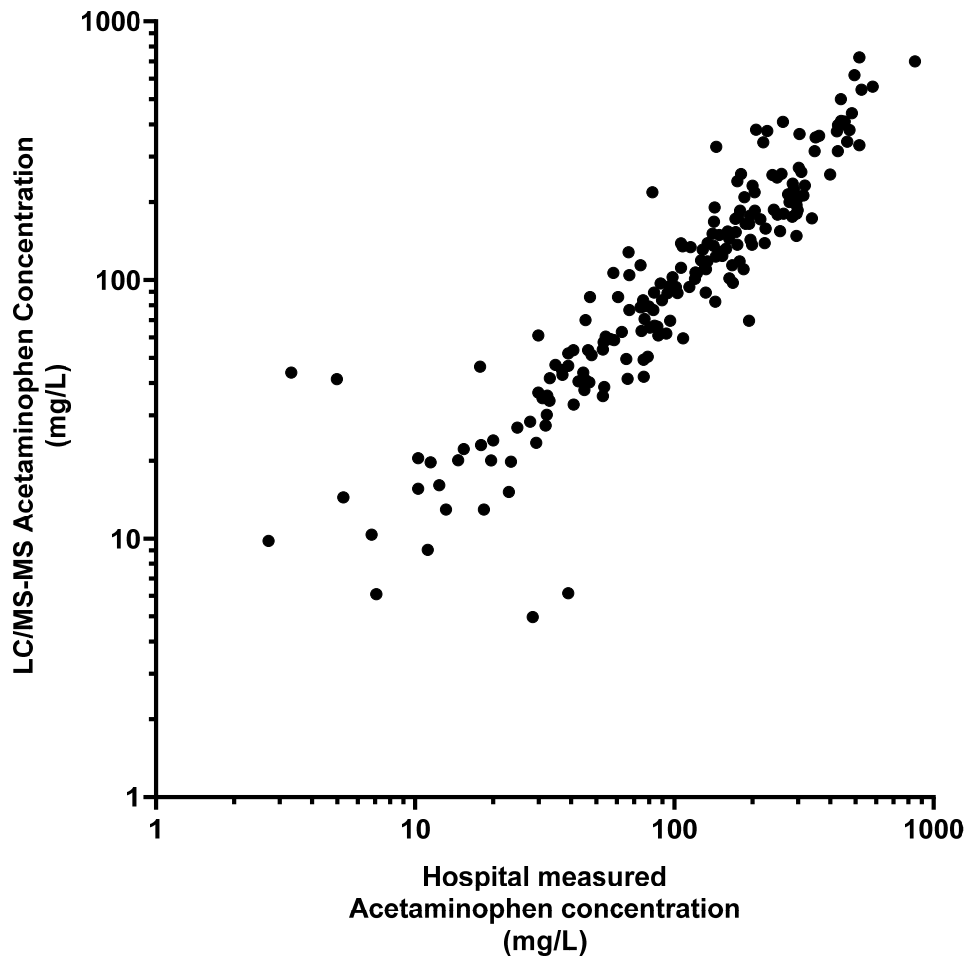

Figure S1: LCMS measured vs hospital measured acetaminophen concentrations (n=195).

**Table S1:** Outcome hepatotoxicity, only those patients with an ALT < 1000 U/L on presentation and not receiving acetylcysteine at the time of the initial acetaminophen and acetaminophen metabolite measurements

| Metabolites/<br>Biomarker with<br>initial<br>acetaminophen<br>concentration | No hepatotoxicity<br>(median) (IQR, n) | Hepatotoxicity<br>(median) (IQR, n) | p value | AUC ROC curve<br>(95% CI) |
|-----------------------------------------------------------------------------|----------------------------------------|-------------------------------------|---------|---------------------------|
| APAP-hospital lab<br>( $\mu\text{mol/L}$ )                                  | 702<br>(301 - 1353, n=119)             | 1106<br>(453 - 1910, n = 21)        | NS      | 0.59<br>(0.45 to 0.72)    |
| ALT                                                                         | 20<br>(15 - 28, n=117)                 | 133<br>(57 - 221, n= 21)            | <0.0001 | 0.90<br>(0.81 to 0.98)    |
| Acetaminophen<br>Ratio                                                      | 1.19<br>(0.43 - 2.01, n= 119)          | 3.45<br>(3.45 - 7.13, n=21)         | <0.0001 | 0.82<br>(0.72 - 0.93)     |
| <b>Acetaminophen metabolite</b>                                             |                                        |                                     |         |                           |
| APAP-LC/MS<br>( $\mu\text{mol/L}$ )                                         | 646<br>(297 - 1145, n= 119)            | 867<br>(360 - 1460, n= 21)          | NS      | 0.57<br>(0.43 to 0.71)    |
| APAP-Glu<br>( $\mu\text{mol/L}$ )                                           | 461<br>(299 - 776, n=119)              | 568<br>(410 - 1120, n=21)           | NS      | 0.61<br>(0.47 - 0.75)     |
| APAP-Sul<br>( $\mu\text{mol/L}$ )                                           | 72.4<br>(50.4 - 102.5, n=119)          | 48.9<br>(24.7 - 72.2, n = 21)       | 0.0031  | 0.70<br>(0.58 to 0.82)    |
| APAP-Cys<br>( $\mu\text{mol/L}$ )                                           | 9.4<br>(5.9 - 16.8, n=119)             | 37.1<br>(26.0 - 52.3, n=21)         | <0.0001 | 0.87<br>(0.77 to 0.99)    |
| APAP-Mer<br>( $\mu\text{mol/L}$ )                                           | 1.03<br>(0.61 - 1.74, n= 119)          | 2.26<br>(1.05 - 4.11, n= 21)        | 0.0023  | 0.71<br>(0.57 to 0.84)    |
| CYP total                                                                   | 10.3<br>(6.8 - 18.3, n=119)            | 39.9<br>(27.8 - 55.3, n=21)         | <0.0001 | 0.87<br>(0.76 to 0.98)    |
| Total Metabolites<br>( $\mu\text{mol/L}$ )                                  | 545<br>(388 - 906, n=119)              | 654<br>(502 - 1237, n=21)           | NS      | 0.60<br>(0.46 - 0.74)     |
| % APAP-Glu                                                                  | 85<br>(79 - 89, n=119)                 | 89<br>(82 - 91, n=21)               | NS      | 0.61<br>(0.47 to 0.74)    |
| % APAP-Sul                                                                  | 12.9<br>(8.5 - 18.2, n=119)            | 5.8<br>(4.6 - 9.9, n=21)            | <0.0001 | 0.78<br>(0.66 to 0.91)    |
| % CYP metabolites                                                           | 1.64<br>(1.16 - 2.80, n= 119)          | 5.55<br>(4.09 - 7.89, n= 21)        | <0.0001 | 0.85<br>(0.76 to 0.94)    |
| <b>Proposed Risk Stratification Tools</b>                                   |                                        |                                     |         |                           |
| APAP-Cys/APAP-<br>Sul                                                       | 0.12<br>(0.07 - 0.23, n = 119)         | 0.88<br>(0.63 - 1.08, n = 21)       | <0.0001 | 0.91<br>(0.83 to 0.98)    |
| ALT * APAP-<br>Cys/APAP-Sul                                                 | 2.65<br>(1.12 - 5.12, n=119)           | 134<br>(42.2 - 237, n = 21)         | <0.0001 | 0.94<br>(0.88 to 1.00)    |
| Acetaminophen<br>Ratio*APAP-Cys                                             | 11.7<br>(2.33 - 22.5, n= 119)          | 110.1<br>(33.0 - 370, n= 21)        | <0.0001 | 0.88<br>(0.79 - 0.97)     |
| Acetaminophen<br>Ratio*APAP-<br>Cys*ALT                                     | 190<br>(58.0 - 525, n= 117)            | 16392<br>(1887 - 72202, n= 21)      | <0.0001 | 0.95<br>(0.91 to 0.99)    |

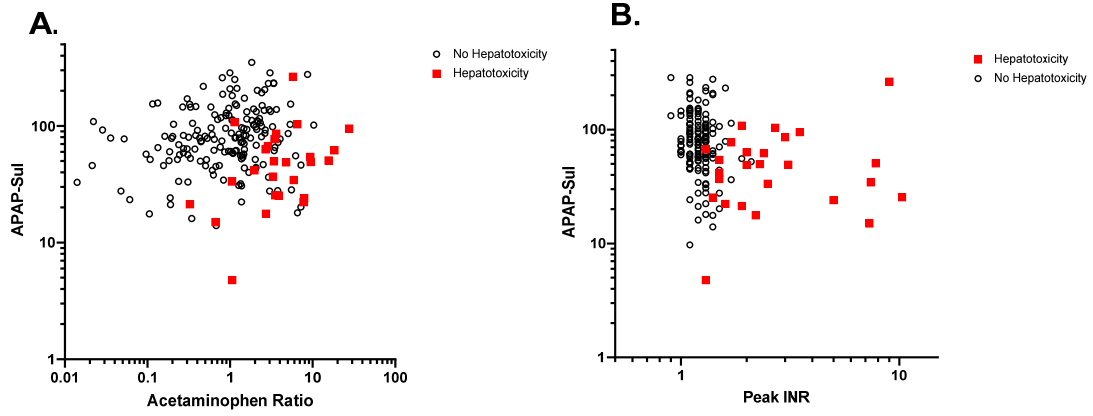

**Figure S2:** Correlation between A/ APAP-Sul and acetaminophen ratio (n= 200) B/ APAP-Sul and peak INR (n= 165)
